## 1 Infectious bronchitis virus regulates cellular stress granule signaling

2 Matthew J. Brownsword<sup>1,2</sup>, Nicole Doyle<sup>1</sup>, Michèle Brocard<sup>2</sup>, Nicolas Locker<sup>2</sup> and Helena J.  
3 Maier<sup>1,\*</sup>

4

5

6 <sup>1</sup> The Pirbright Institute, Pirbright, Surrey, GU24 0NF, UK;  
7 [matthew.brownsword@pirbright.ac.uk](mailto:matthew.brownsword@pirbright.ac.uk) (M.J.B.); [nicole.doyle@pirbright.ac.uk](mailto:nicole.doyle@pirbright.ac.uk) (N.D.)

8 <sup>2</sup> Faculty of Health and Medical Sciences, School of Biosciences and Medicine, University of  
9 Surrey, Guildford, Surrey, GU2 7XH, UK; [m.brocard@surrey.ac.uk](mailto:m.brocard@surrey.ac.uk) (M.B.);  
10 [n.locker@surrey.ac.uk](mailto:n.locker@surrey.ac.uk) (N.L.)

11 \* Correspondence: [helena.maier@pirbright.ac.uk](mailto:helena.maier@pirbright.ac.uk); Tel.: +44-(0)1483-232441

12

13 **Keywords:** infectious bronchitis virus; IBV; stress granule; SG; eIF2 $\alpha$ ; host shut-off;  
14 translation inhibition

15

### 16 Abstract

17 Viruses must hijack cellular translation machinery to efficiently express viral genes. In many  
18 cases, this is impeded by cellular stress responses. These stress responses swiftly relocate  
19 and repurpose translation machinery, resulting in global inhibition of translation and the  
20 aggregation of stalled 48S mRNPs into cytoplasmic foci called stress granules. This results in  
21 translational silencing of all mRNAs excluding those beneficial for the cell to resolve the  
22 specific stress. For example, expression of antiviral factors is maintained during viral infection.  
23 Here we investigated stress granule regulation by *Gammacoronavirus* infectious bronchitis  
24 virus (IBV), which causes the economically important poultry disease, infectious bronchitis.  
25 Interestingly, we found that IBV is able to inhibit multiple cellular stress granule signaling  
26 pathways whilst at the same time IBV replication also results in induction of seemingly  
27 canonical stress granules in a proportion of infected cells. Moreover, IBV infection uncouples  
28 translational repression and stress granule formation and both processes are independent of  
29 eIF2 $\alpha$  phosphorylation. These results provide novel insights into how IBV modulates cellular  
30 translation and antiviral stress signaling.

31

32

### 33 Introduction

34 During replication within a host cell, all viruses must regulate a variety of cellular processes to  
35 generate an environment that allows progeny virus to be produced to continue the infection  
36 cycle. This includes promoting pathways that are favorable to replication and overcoming  
37 intrinsic immune pathways. Cellular stress granules (SG) play an important role in regulation  
38 of gene expression by regulating mRNA translation and location as well as integrating

39 intracellular signaling and antiviral responses and are therefore often targeted by viruses  
40 (McCormick and Khaperskyy, 2017; Walsh *et al.*, 2013). SG are cytoplasmic, non-membrane  
41 bound aggregations of mRNA associated with translation initiation factors, the 40S ribosome  
42 and RNA binding proteins. They primarily form under stress conditions that trigger the  
43 phosphorylation of translation initiation factor eIF2 $\alpha$  (Kedersha and Anderson, 2002). There  
44 are four eIF2 $\alpha$  kinases; protein kinase R (PKR), recognizing dsRNA, PKR-like endoplasmic  
45 reticulum kinase (PERK), sensing ER stress, heme regulated eIF2 $\alpha$  kinase (HRI) and general  
46 control nonderepressible 2 (GCN2), activated by oxidative stress and amino acid deprivation  
47 (Deng *et al.*, 2002; Garcia *et al.*, 2007; Harding *et al.*, 1999; Lu *et al.*, 2001). Despite PKR  
48 being the assumed major kinase to activate the integrated stress response (ISR) during viral  
49 infection, PERK (Cheng *et al.*, 2005) and GCN2 (Berlenga *et al.*, 2006) have also been found  
50 to play an important role during viral infection. Phosphorylation of eIF2 $\alpha$  prevents delivery of  
51 the initiator tRNA to initiating ribosomes, therefore inhibiting translation initiation and leading  
52 to the accumulation of stalled 48S mRNPs. SG can also be formed independently of eIF2 $\alpha$  by  
53 interference with the RNA helicase eIF4A, which is required to unwind the mRNA untranslated  
54 region (UTR) during ribosome recruitment (Mazroui *et al.*, 2006). This can be achieved by use  
55 of the chemicals pateamine A (Low *et al.*, 2005), hippuristanol and hydrogen peroxide  
56 (Bordeleau *et al.*, 2005; Bordeleau *et al.*, 2006; Emara *et al.*, 2012). SG formation occurs in a  
57 multi-step process culminating in large compartments with dense cores held together by weak  
58 RNA-protein interactions that can merge to form SG with multiple cores. This process is  
59 driven by interactions between aggregation prone RNA binding proteins including Ras GAP  
60 SH3-domain binding protein 1 (G3BP1), T-cell restricted intracellular antigen 1 (TIA-1) and  
61 TIA-1 related protein (TIAR) (McCormick and Khaperskyy, 2017; Protter and Parker, 2016;  
62 Wheeler *et al.*, 2016). Next a liquid-like layer is formed around the core by liquid-liquid phase  
63 separation. This is achieved by interactions between RNA binding proteins containing  
64 intrinsically disordered regions (IDR) and by RNA-RNA interactions (Contu *et al.*, 2019; Lin *et al.*,  
65 2015; Molliex *et al.*, 2015; Van Treeck *et al.*, 2018; Wheeler *et al.*, 2016). SG are highly  
66 dynamic, able to rapidly assemble, fuse and dissolve. They can act as storage sites for  
67 mRNAs allowing rapid translation reactivation upon stress resolution or mRNAs can be  
68 shuttled to sites of decay. SG are also proposed to play a role in antiviral signaling as key  
69 signaling proteins including MDA5 and PKR are known to localize to SGs and SG formation is  
70 involved in PKR activation (McCormick and Khaperskyy, 2017; Reineke *et al.*, 2015).

71

72 Viruses rely on cellular translation machinery for the synthesis of viral proteins. Therefore, the  
73 role of SG in inhibition of translation means they are often targeted by viruses to disrupt their  
74 function. Some viruses induce SG at early time points post infection but then inhibit their  
75 formation at later stages, either by inhibiting phosphorylation of eIF2 $\alpha$  (Poblete-Duran *et al.*,  
76 2016) or by cleaving SG scaffold proteins like G3BP1 (White *et al.*, 2007). Other viruses

77 prevent formation of canonical SGs by redirecting SG proteins to virus driven atypical  
78 granules that co-localize with sites of viral RNA synthesis or particle assembly, benefiting  
79 virus replication (Fros *et al.*, 2012; Matthews and Frey, 2012).

80

81 Coronaviruses are positive strand RNA viruses that cause economically important diseases in  
82 humans and other species, including porcine epidemic diarrhea virus, SARS-coronavirus  
83 (CoV) and MERS-CoV. Only a few studies have been performed on the role of SG during the  
84 replication of coronaviruses. SG were found in cells infected with *Alphacoronavirus*  
85 transmissible gastroenteritis virus (TGEV). Here, viral RNA was found to be targeted to SG via  
86 an interaction with polyrimidine tract binding protein (PTB) (Sola *et al.*, 2011). SG were also  
87 found in cells infected with *Betacoronavirus* mouse hepatitis virus (MHV). Knock down of SG  
88 components, such as G3BP1 or prevention of eIF2 $\alpha$ -phosphorylation resulted in increased  
89 viral replication, suggesting SG perform an antiviral role (Raaben *et al.*, 2007). Recently,  
90 *Betacoronavirus* MERS-CoV was found to inhibit SG formation via a process involving  
91 accessory protein 4a interaction with dsRNA and antagonism of PKR (Nakagawa *et al.*, 2018;  
92 Rabouw *et al.*, 2016).

93

94 Infectious bronchitis virus (IBV) is a *Gammacoronavirus* causing infectious bronchitis, a  
95 respiratory disease in poultry. It has been shown by others that early during IBV infection,  
96 eIF2 $\alpha$  is phosphorylated via both PKR and PERK activation. However, at later stages, eIF2 $\alpha$   
97 is dephosphorylated via the upregulation of GADD153 and GADD34, promoting activity of the  
98 phosphatase PP1 (Liao *et al.*, 2013; Wang *et al.*, 2009). In addition, IBV is has been shown to  
99 shut off host translation in a process involving viral accessory protein 5b (Kint *et al.*, 2016).  
100 Despite this knowledge, the formation of SG or regulation of SG signaling during IBV  
101 replication and how this relates to regulation of translation has not been studied. Here, we  
102 present a detailed analysis of IBV regulation of cellular SG signaling and how this integrates  
103 with shut off of translation.

104

## 105 **Materials and Methods**

### 106 **Cells, viruses and reagents**

107 Vero cells were maintained in 1x Eagle's modified essential medium (Sigma) supplemented  
108 with 1x L-glutamine (Gibco) and 10% fetal bovine serum (Sigma). Recombinant IBV strain  
109 BeauR has been described previously (Britton *et al.*, 2005). Inactivated IBV was generated by  
110 treatment with binary ethylenimine (BEI). Briefly, virus was incubated in 0.1 M BEI for 48  
111 hours at 37 °C followed by inactivation of BEI by addition of 1 M sodium thiosulfate.  
112 Inactivation of virus was confirmed by RT-qPCR following infection of cells. Sodium arsenite,  
113 cycloheximide, puromycin and emetine were purchased from Sigma.

114

## 115 Immunofluorescence

116 Vero cells seeded onto glass coverslips were mock infected or infected with IBV and  
117 incubated at 37 °C. After 1 hour, 1x BES (MEM, 0.3% tryptose phosphate broth, 0.2% bovine  
118 serum albumin, 20 mM *N,N*-Bis(2-hydroxyethyl)-2-aminoethanesulfonic acid (BES), 0.21%  
119 sodium bicarbonate, 2 mM L-glutamine, 250 U/mL nystatin, 100 U/mL penicillin, and 100  
120 U/mL streptomycin) was added and cells incubated for the indicated time. Where indicated,  
121 cells were treated for 1 hour prior to fixation with 500 µM sodium arsenite or 35 µM  
122 cycloheximide or for 2 hours prior to fixation with 2 µM hydrogen peroxide. Cells were fixed in  
123 4% paraformaldehyde in PBS, permeabilized in 0.1% triton X-100 in PBS and blocked in 0.5%  
124 bovine serum albumin (BSA) in PBS. Primary and secondary antibodies were diluted in  
125 blocking buffer. Nuclei were stained with 4',6-diamidino-2-phenylindole (DAPI). Anti-dsRNA  
126 J2 (English and Scientific Consulting) was diluted 1:1000, anti-nsp12 (Maier *et al.*, 2013) was  
127 diluted 1:1000, anti-S2 (26.1) was diluted 1:500, anti-IBV (Abcam) was diluted 1:1000,  
128 anti-G3BP1 (BD biosciences) was diluted at 1:500, anti-G3BP1 (Sigma) was diluted 1:500,  
129 anti-eIF3η (Santa-Cruz) was diluted 1:500 and anti-eIF4G (Santa-Cruz) was diluted 1:500.  
130 Alexa Fluor-conjugated secondary antibodies (Invitrogen) were diluted 1:500. Cells were  
131 visualized using a Leica SP5 or Nikon Ti Eclipse confocal microscope. To determine the  
132 percentage cells positive for SG, cells were counted manually with at least 50 cells counted  
133 over three independent biological replicates.

134

## 135 Fluorescent in situ hybridization (FISH)

136 Vero cells seeded onto glass coverslips were mock or IBV infected. After 24 hours, cells were  
137 fixed and labelled using the Stellaris RNA FISH simultaneous labelling protocol (Biosearch  
138 technologies). Briefly, cells were fixed in 10% formaldehyde in PBS and permeabilized in 70%  
139 ethanol at 4 °C. Cells were incubated overnight at 37 °C in a humidified chamber with  
140 hybridization buffer containing 125 nM probe and primary antibody. Cells were then washed  
141 and labelled with Alexa Fluor-conjugated secondary antibody and DAPI. Finally, cells were  
142 mounted onto glass coverslips using Vectashield and sealed with nail varnish. Cells were  
143 visualized using a Leica SP5 confocal microscope. Stellaris FISH probes with a Quasar 570  
144 label were designed specific for the nsp15 and nsp16 region of the IBV BeauR genome.

145

## 146 Cell lysis and western blot

147 Vero cells seeded in 6 well plates were mock or IBV infected. At the indicated time points,  
148 cells were washed once with cold PBS and lysed in 1x sample buffer (Biorad) containing DTT.  
149 Cell lysates were heated to 95 °C for 3 minutes and briefly sonicated. Proteins were separated  
150 on a 4-20 % Bis-Tris gel (Biorad) and transferred onto nitrocellulose membranes. These were  
151 blocked in 0.5% BSA or 5% milk in TBS-Tween (TBST) then incubated with primary antibody  
152 diluted in blocking buffer. Following three washes in TBS-T, membranes were incubated with

153 HRP labelled secondary antibodies (Dako) diluted in blocking buffer. After three further  
154 washes in TBS-T, blots are incubated chemiluminescence substrate using the Clarity  
155 Western ECL Substrate (Bio-Rad). Labelled protein bands were visualized using a Vilber  
156 imaging system. Anti-IBV was diluted 1:1000, anti-eIF2 $\alpha$  (Cell Signaling Technologies) was  
157 diluted 1:1000, anti-eIF2 $\alpha$ -p (Cell Signalling Technologies) was diluted 1:2000 and  
158 anti-GAPDH (Invitrogen) was diluted 1:10000.

159

#### 160 **Ribopuromylation (RPM)**

161 Vero cells seeded onto glass coverslips were mock or IBV infected as before. RPM was  
162 performed as described by David *et.al* (David *et al.*, 2012). Briefly, one hour prior to  
163 processing, control wells were treated with 500  $\mu$ M sodium arsenite. At the indicated times  
164 post infection, cells were incubated with 18.4  $\mu$ M puromycin for 30 seconds at room  
165 temperature and then incubated with 18.4  $\mu$ M puromycin and 208  $\mu$ M emetine at room  
166 temperature for 1 minute. Cells were washed three times with room temperature 1xBES  
167 media, fixed and processed for immunofluorescence as described above. Anti-puromycin  
168 (Sigma) was diluted 1:10000. To quantify immunofluorescence images, the puromycin signal  
169 in 100 cells was determined using ImageJ (Schneider *et al.*, 2012).

170

### 171 **Results**

#### 172 **IBV replication induces stress granules in a proportion of infected cells**

173 Initially, the ability of IBV to induce SG during replication was assessed. Vero cells were  
174 infected with IBV and at the indicated time points cells were fixed and labelled with  
175 anti-dsRNA to detect virus infection and with anti-G3BP1 to detect SG. At each time point,  
176 infected cells were present, with the number of infected cells increasing over time, as  
177 expected (Figure 1A). In addition, at each of the time points tested, G3BP1 puncta were  
178 detected in a proportion of, but not all, infected cells with diffuse G3BP1 found in the  
179 remaining infected and uninfected cells. Subsequently, the number of infected cells with and  
180 without G3BP1 puncta was determined. The percentage of infected cells containing G3BP1  
181 puncta was found to be between 10 and 25% (Figure 1B) and this percentage remained  
182 unchanged over the course of infection, with no statistical difference between the percentages  
183 of cells containing puncta at any time point. Therefore, IBV replication triggers the formation of  
184 G3BP1 puncta, but interestingly, only in 10-25% of infected cells.

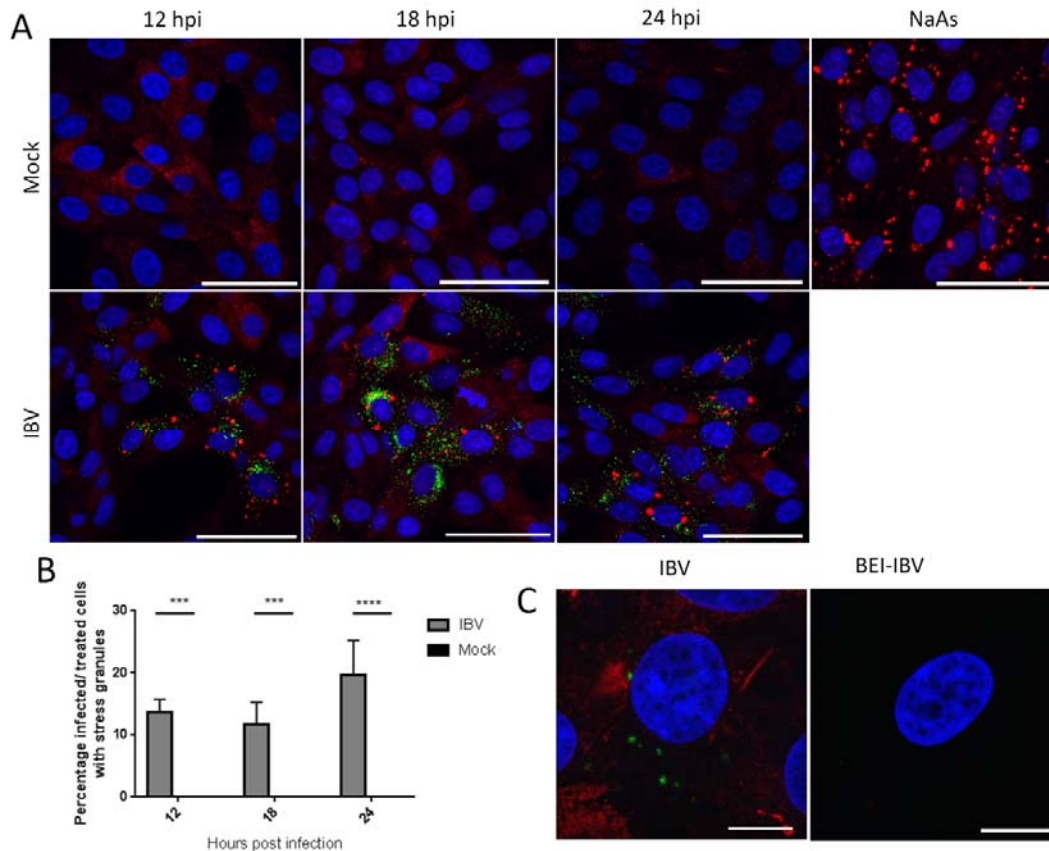

185

186 **Figure 1.** IBV infection induces stress granules in a proportion of infected cells. **(A)** Vero  
187 cells were mock infected or infected with IBV. At 12, 18 and 24 hpi, cells were labelled for  
188 stress granules (SG) with an anti-G3BP1 antibody (red) and IBV infection was detected  
189 with an anti-dsRNA antibody (green). Nuclei were stained with DAPI (blue). Positive  
190 control cells were treated with sodium arsenite (NaAs) to induce eIF2 $\alpha$ -dependent SG.  
191 Scale bar indicates 50  $\mu$ m. **(B)** Images in (A) were quantified by manual counting of SG  
192 positive cells, identified by counting infected or treated cells with G3BP1 foci. A minimum  
193 of 100 cells were counted from three independent replicates. The mean and standard  
194 deviation is shown. Asterisks indicate statistical significance as measured by one-way  
195 ANOVA, \*\*\* represents  $p < 0.005$  and \*\*\*\* represents  $p < 0.0005$ , respectively. **(C)** Vero  
196 cells were infected with IBV or BEI-inactivated IBV. At 24 hpi, cells were labelled with  
197 anti-G3BP1 (green) and anti-IBV (red). Nuclei were stained with DAPI (blue). Scale bar  
198 indicates 10  $\mu$ m.

199

200 Following identification of SG in IBV infected cells, the requirement for active virus replication  
201 in induction of granules was assessed. Cells were infected with wild type IBV or a  
202 BEI-inactivated virus. After 24 hours, cells were fixed and labelled with anti-dsRNA and  
203 anti-G3BP1. While cells infected with wild type IBV contained SG as observed before, cells

204 infected with the inactivated virus did not (Figure 1C). Therefore, induction of SG requires  
205 actively replicating virus and is not a response by the cell to the presence of the virus particle.  
206

### 207 **IBV replication inhibits chemical induction of stress granules**

208 As IBV replication did not induce SG in every infected cell, it was hypothesised that IBV may  
209 be able to inhibit formation of canonical SG. To test this, cells were infected with IBV for 24  
210 hours and prior to fixation, cells were treated with sodium arsenite for 1 hour or hydrogen  
211 peroxide for 2 hours to induce stress granule formation. Sodium arsenite induces  
212 eIF2 $\alpha$ -dependent SG by activating the eIF2 $\alpha$  kinase HRI. Hydrogen peroxide induces SG in  
213 an eIF2 $\alpha$ -independent process by disrupting the eIF4F complex. Following fixation, cells were  
214 labelled with anti-dsRNA to detect virus infected cells and anti-G3BP1 to visualize SG. In  
215 uninfected cells, treatment with either sodium arsenite or hydrogen peroxide resulted in the  
216 formation of SG (Figure 2A). However, in IBV infected cells both sodium arsenite and H<sub>2</sub>O<sub>2</sub>  
217 induction of SG was blocked with G3BP1 in infected cells remaining largely diffuse (Figure  
218 2A). The percentage of cells containing G3BP1 foci was then determined (Figure 2B). In the  
219 absence of chemical treatment, 17% of IBV infected cells contained SG. When mock infected  
220 cells were treated with sodium arsenite or hydrogen peroxide, 83 and 74% of cells were  
221 positive for SG, respectively. However, when IBV infected cells were sodium arsenite or  
222 hydrogen peroxide treated, only 18 and 9% infected cells contained SG, respectively.  
223 Therefore, IBV infection inhibits both eIF2 $\alpha$ -dependent and independent stress granule  
224 induction.

225

226

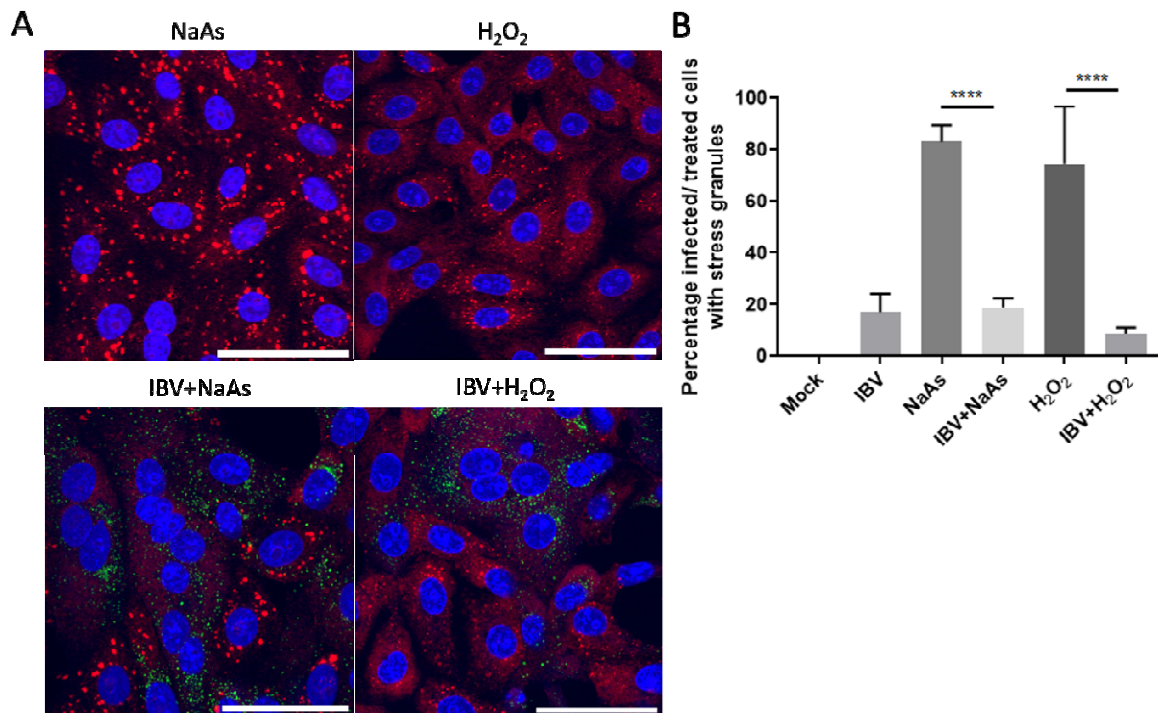

227

228

229 **Figure 2.** IBV inhibits eIF2 $\alpha$ -dependent and independent stress granule induction. (A)

230 Vero cells were mock infected or infected with IBV for 24 hours. Prior to fixation, cells

231 were treated for 1 hour with 500  $\mu$ M sodium arsenite (NaAs) to activate the

232 eIF2 $\alpha$ -dependent pathway or for 2 hours with 2  $\mu$ M hydrogen peroxide (H<sub>2</sub>O<sub>2</sub>) to activate

233 the eIF2 $\alpha$ -independent pathway. At 24 hpi cells were fixed and stress granules (SG)

234 labelled with an anti-G3BP1 antibody (red). IBV infection was detected with an

235 anti-dsRNA antibody (green). Nuclei were stained with DAPI (blue) and scale bar

236 indicates 50  $\mu$ m. (B) Images from (A) were quantified by manual counting of SG positive

237 cells, identified by counting infected or treated cells with G3BP1 foci. A minimum of 50

238 cells were counted. Data from three independent replicates. Asterisks indicate statistical

239 significance as measured by one-way ANOVA, \*\*\*\* p 0.0001.

240

#### 241 **Stress granules in IBV infected cells are canonical**

242 Several viruses have been shown to promote the formation of specific virus-induced

243 cytoplasmic foci by recruitment and relocalisation of many SG components including G3BP1

244 and G3BP2 (Fros *et al.*, 2012; Matthews and Frey, 2012; McInerney *et al.*, 2005;

245 Poblete-Duran *et al.*, 2016). Therefore, following identification of G3BP1 puncta in some IBV

246 infected cells, the nature of these puncta was investigated to determine whether they were

247 canonical SG or virus-specific granules. Canonical SG contain multiple stress granule

248 mediators such as G3BP1, translation initiation factors, ribosomal subunits and m-RNA



249 Therefore, the presence of punctate translation initiation factors eIF3 $\eta$  and eIF4G in infected  
250 cells was investigated. Cells were infected with IBV and after 24 hours, cells were fixed and  
251 labelled with anti-dsRNA and either anti-eIF3 $\eta$  or anti-eIF4G. As expected, eIF3 $\eta$  and eIF4G  
252 were diffuse within the cytoplasm in mock infected cells (Figure 3A). Similar to previous  
253 observations using G3BP1, in a proportion of virus infected cells, both eIF3 $\eta$  and eIF4G were  
254 found in cytoplasmic puncta with the remaining infected cells containing diffuse eIF3 $\eta$  or  
255 eIF4G (Figure 3). Therefore, IBV infection induces the formation of SG that contain multiple  
256 SG marker proteins.

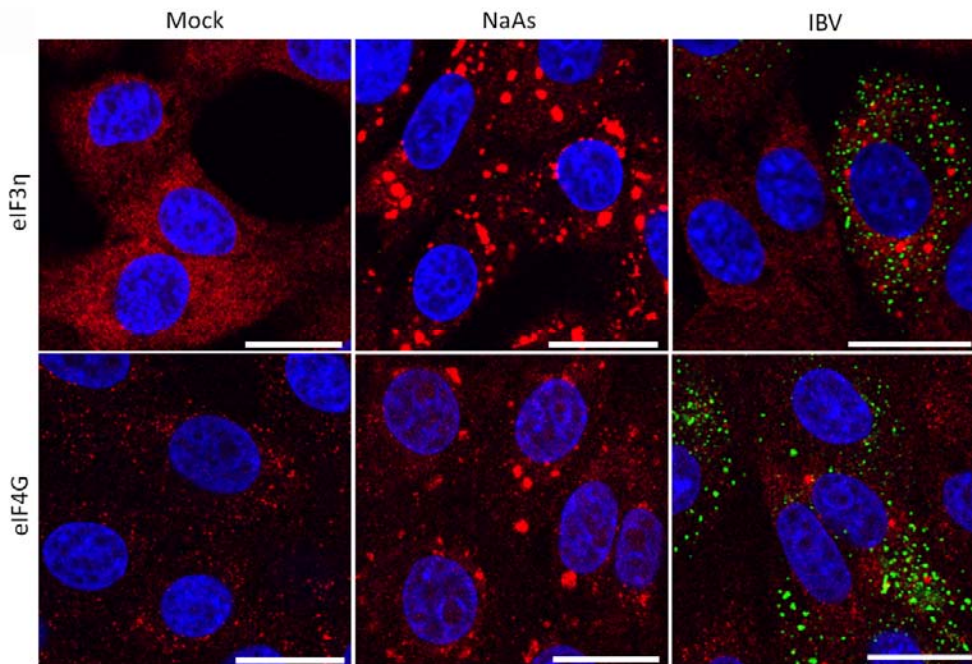

257  
258 **Figure 3.** IBV induced stress granules contain multiple stress granule markers. Vero cells  
259 were mock infected or infected with IBV. One hour prior to fixation, where indicated cells  
260 were treated with sodium arsenite (NaAs). At 24 hpi, cells were fixed and labelled with  
261 dsRNA (green) and anti-eIF3 $\eta$  (red) or eIF4G (red), Nuclei were stained with DAPI (blue).  
262 Scale bars indicates 20  $\mu$ m. Images are representative of three independent repeats.  
263

264 In addition to containing multiple stress granule marker proteins, canonical SG are dissolved  
265 in the presence of cycloheximide. As mRNAs are constantly shuttled between SG and  
266 ribosomes, cycloheximide binding to the ribosome, preventing release of mRNA, inhibits  
267 recycling to SG. As a result, SG are dissolved. To further understand the nature of IBV  
268 induced SG, their susceptibility to cycloheximide treatment was determined. Cells were  
269 infected with IBV for 24 hours and one hour prior to fixation, cells were treated with  
270 cycloheximide. Cells were then labelled with anti-dsRNA and anti-G3BP1. Firstly, it was  
271 confirmed that SG induced with sodium arsenite in uninfected cells were dissolved by  
272 treatment with cycloheximide (Figure 4A). When cycloheximide treatment was applied to IBV

273 infected cells, a significant decrease in the number of cells containing SG was observed. The  
274 percentage of infected cells containing SG was quantified (Figure 4B) and, interestingly, the  
275 number of IBV infected cycloheximide treated cells containing SG was reduced to a value not  
276 significantly different from mock cells. Together, this shows that IBV infection induces SG that  
277 contain multiple SG markers and are susceptible to cycloheximide, indicating that they are  
278 likely to be canonical SG.

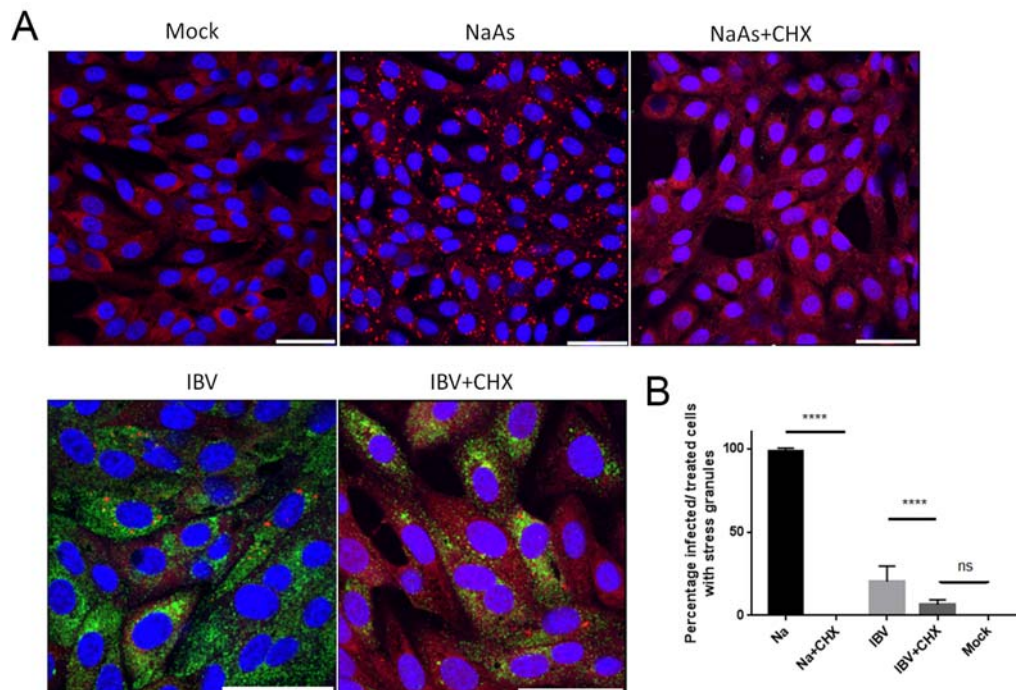

279  
280 **Figure 4.** IBV induced stress granules are dissolved by cycloheximide treatment. **(A)**  
281 Vero cells were mock infected or infected with IBV. Where indicated cells were treated  
282 with sodium arsenite (NaAs). Cells were then mock treated or treated with cycloheximide  
283 (CHX) to dissolve SG. At 24 hpi, cells were fixed and labelled to detect stress granules  
284 (SG) with anti-G3BP1 (red) and IBV infected cells were detected with an anti-dsRNA  
285 antibody (green). Nuclei were stained with DAPI (blue). Scale bar indicates 20  $\mu\text{m}$ . **(B)**  
286 Images from (A) were quantified to determine the percentage of cells containing SG. A  
287 minimum of 50 cells were counted. Mean and standard deviation of three independent  
288 replicates are shown. Asterisks indicate statistical significance as measured by one-way  
289 ANOVA, \*\*\*\*  $p < 0.0001$ ; ns, not significant.

290

### 291 **IBV genomic RNA is not diverted to stress granules during infection**

292 It was previously found that during replication of *Alphacoronavirus* TGEV, viral RNA was  
293 targeted to virus-induced SG and this was thought to be important for their anti-viral function  
294 (Sola *et al.*, 2011). Therefore, to further understand IBV induced SG and to determine whether  
295 IBV RNA is also targeted to SG, viral genomic RNA was visualized by FISH. Cells were

296 infected with IBV or mock infected. After 24 hours, cells were fixed and labelled with the FISH  
297 probes and anti-G3BP1 (Figure 5). Viral genomic RNA was found to be located in foci within  
298 the cytoplasm. In addition, G3BP1 puncta were detected in a percentage of infected cells, as  
299 seen before. However, no co-localization was observed between viral genomic RNA and  
300 G3BP1 containing SG. Therefore, IBV genomic RNA is not targeted to SG.

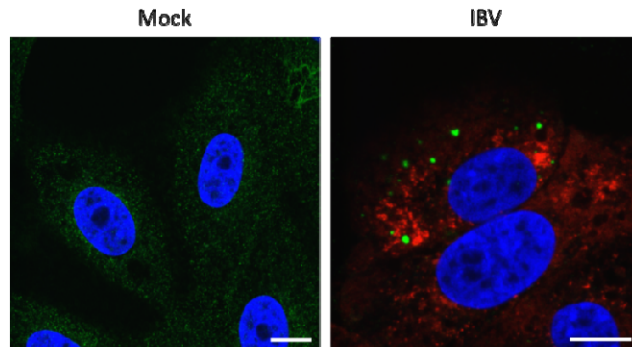

301  
302 **Figure 5.** IBV genomic RNA is not diverted to stress granules during infection. Vero cells  
303 were mock infected or infected with IBV for 24 hours. IBV genomic RNA (red) was  
304 detected using FISH probes and anti-G3BP antibody was used to detect SG (green).  
305 Nuclei were stained using DAPI (blue). Scale bars indicate 10  $\mu\text{m}$ . Images are  
306 representative of three independent replicates.

307

### 308 **Stress granules are not diverted to sites of virus replication**

309 During the replication of several other viruses including Ebola virus, West Nile virus, dengue  
310 virus and tick-borne encephalitis virus, stress granule markers are redirected to sites of virus  
311 replication (Albornoz *et al.*, 2014; Emara and Brinton, 2007; Nelson *et al.*, 2016). To  
312 investigate whether IBV induced SG co-localize with sites of viral RNA synthesis or virion  
313 assembly, cells were infected with IBV and after 24 hours, fixed and labelled with anti-G3BP1  
314 as well as antibodies specific for dsRNA, thought to be an intermediate in viral RNA synthesis,  
315 nsp12, the viral RNA-dependent RNA polymerase or spike protein to label for sites of progeny  
316 virus assembly. Consistent with earlier experiments, dsRNA did not co-localize with G3BP1  
317 foci (Figure 6). In addition, G3BP1 did not to co-localize with either nsp12 or spike. Therefore,  
318 IBV does not direct SG markers to sites of virus replication.

319

320

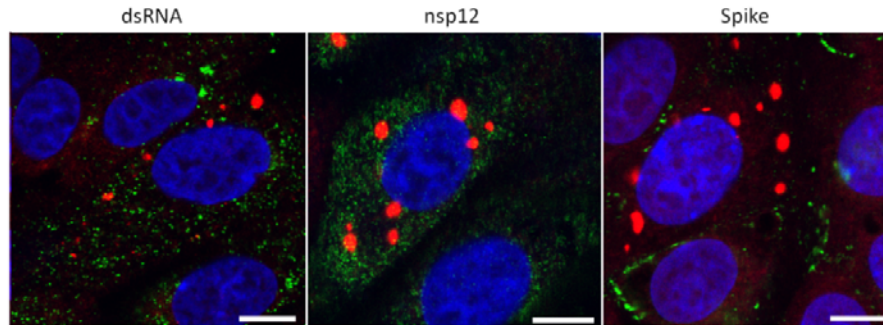

321

322 **Figure 6.** Stress granule markers are not diverted to sites of IBV replication. Vero cells  
323 were infected with IBV. At 24 hpi, cells were labelled to detect G3BP1 (red) and either  
324 dsRNA, nsp12 or spike (green). Nuclei were stained with DAPI (blue). Scale bar indicates  
325 10  $\mu$ m. Images are representative of three independent replicates.

326

### 327 **Stress granule formation in IBV infected cells is not correlated with translational** 328 **shut-off**

329 The formation of SG in cells is closely associated with an inhibition of translation. Previous  
330 work has demonstrated that IBV replication is associated with a shutdown of host translation  
331 from around 12 hours post infection with translation of viral proteins also ceasing by 24 hpi  
332 (Kint *et al.*, 2016). However, translational activity on a single cell level has not been  
333 characterized. Therefore ribopuromycylation (RPM) was used to visualize actively translating  
334 ribosomes over a time course of infection (David *et al.*, 2012). Cells were infected with IBV  
335 and nascent polypeptides labelled with puromycin at 12, 18 and 24 hpi followed by stalling of  
336 translating ribosomes with emetine. Cells were then fixed, stained with an anti-puromycin  
337 antibody and infected cells were detected with an anti-IBV antibody. In mock infected cells,  
338 active translation was detected with a diffuse puromycin signal throughout the cytoplasm. This  
339 signal was absent without puromycin treatment or upon treatment of cells with sodium  
340 arsenite to inhibit translation (Figure 7A). Following IBV infection at all three time points  
341 studied, two phenotypes were observed. Some cells contained the diffuse puromycin signal  
342 detected in mock infected cells. Alternatively, a proportion of infected cells showed reduced  
343 puromycin signal (Figure 7B). To enable the level of translational shut off to be determined,  
344 puromycin signal was quantified in at least 50 infected cells and surrounding non-infected  
345 cells (Figure 7C). This indicated that there was a shut off of translation at all time points.  
346 Furthermore, the degree of translational inhibition increased as infection progressed with a  
347 more pronounced shut off at 18 and 24 than at 12 hpi. However, consistent with previous work  
348 (Kint *et al.*, 2016), this single cell RPM indicates that translational shut off of infected cells is  
349 seen from 12 hpi and increases with the duration of infection. Therefore our observation that  
350 infection results in translational shut-off while only 20% of infected cells contain SGs suggests  
351 that SG assembly is uncoupled from translational arrest and/or impaired during IBV infection.

352

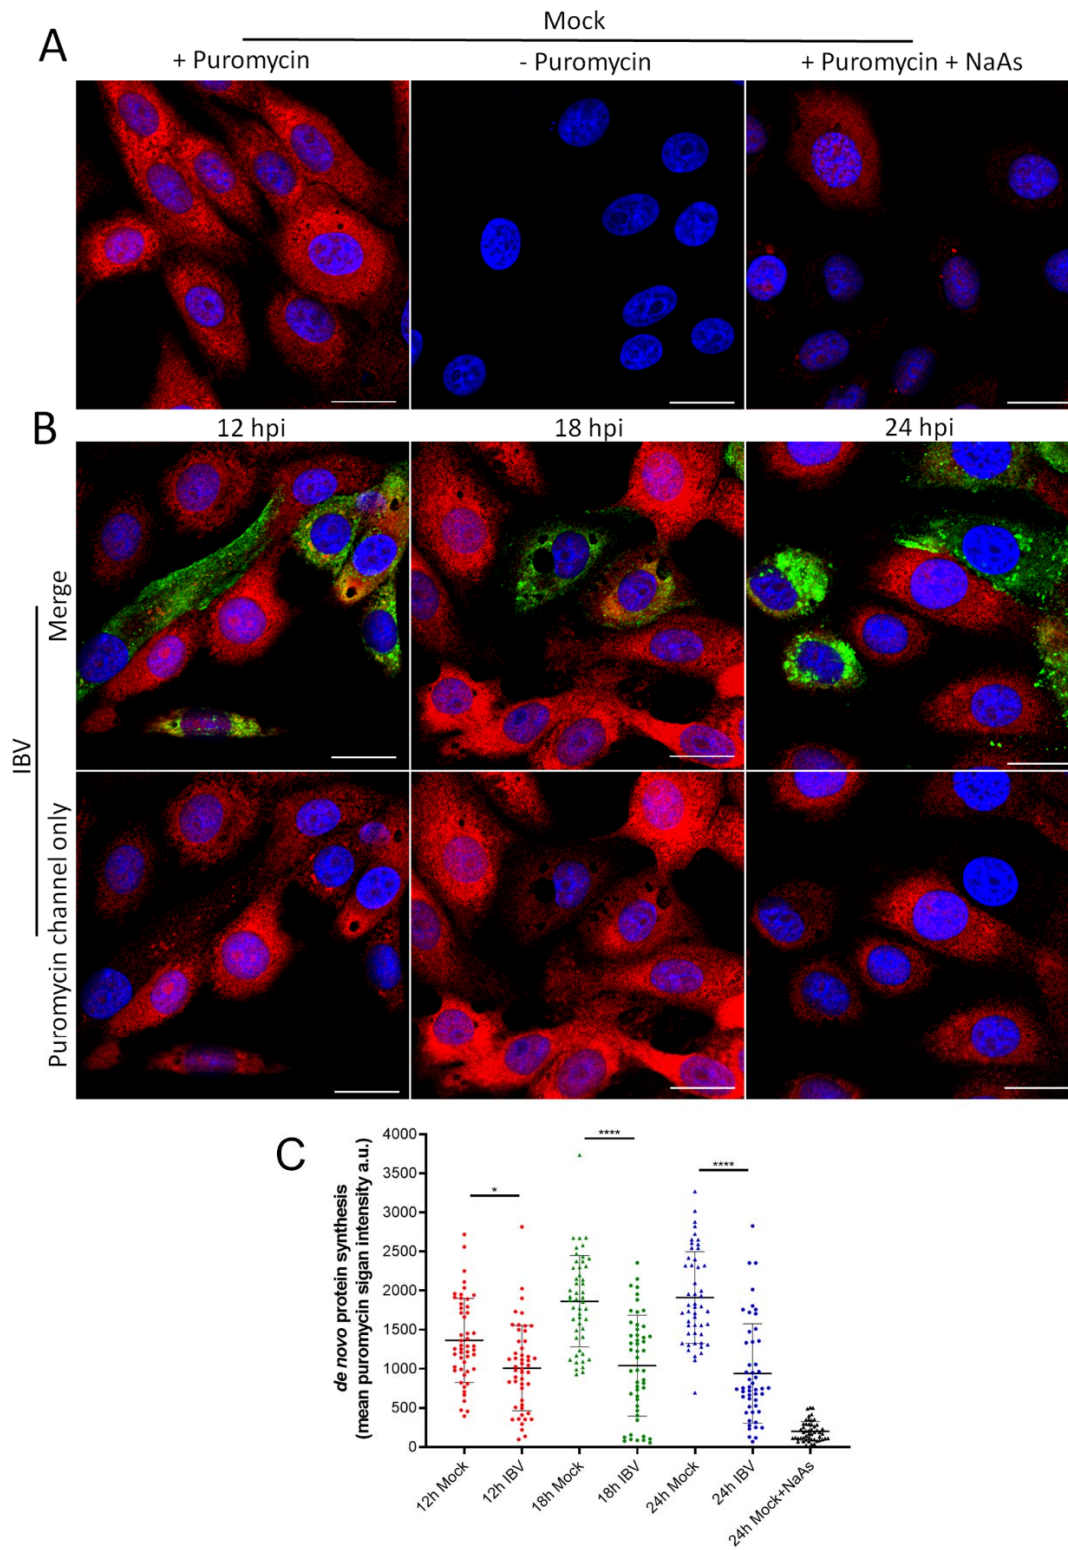

353

354

355

356

357

**Figure 7.** IBV infection results in translational shut-off. **(A-B)** Vero cells were mock infected **(A)** or infected with IBV **(B)**. At 23 hpi, positive control cells were treated with sodium arsenite (NaAs) to induce inhibition of translation. At 12, 18 and 24 hpi cells were treated with puromycin (or -puromycin) followed by emetine. Cells were then fixed and

358 nascent polypeptides labelled with an anti-puromycin antibody (red) and IBV infected  
359 cells labelled with an anti-IBV antibody (green). Nuclei were stained with DAPI (blue).  
360 Scale bar indicates 20  $\mu$ m. **(C)** Images from A and B were quantified. Mean puromycin  
361 channel fluorescence was analyzed in 50 cells. Data presented is representative of three  
362 independent biological replicates. Asterisks indicate statistical significance as measured  
363 by one-way ANOVA, \*  $p = 0.02$ ; \*\*\*\*  $p < 0.0001$ .

364

365 **Stress granule formation and translational shut-off during IBV replication are**  
366 **independent of eIF2 $\alpha$  phosphorylation**

367 Both stress granule formation and translational shut-off are usually associated with  
368 phosphorylation of eIF2 $\alpha$ . Previous work by others has demonstrated that IBV infection  
369 results in eIF2 $\alpha$  phosphorylation at early time points but that the virus inhibits this as infection  
370 progresses (Wang *et al.*, 2009). Therefore, the phosphorylation status of eIF2 $\alpha$  was  
371 investigated. Vero cells were infected with IBV and lysed at 6, 12, 18 and 24 hpi. Proteins  
372 were separated by SDS-PAGE and transferred to nitrocellulose. Blots were labelled using  
373 anti-eIF2 $\alpha$  to detect total eIF2 $\alpha$ , anti-eIF2 $\alpha$ -p to detect the phosphorylated eIF2 $\alpha$ , anti-IBV to  
374 detect virus and anti-GAPDH as a loading control (Figure 8A). Total levels of eIF2 $\alpha$  remained  
375 unchanged throughout infection. Furthermore, eIF2 $\alpha$  phosphorylation was achieved using  
376 sodium arsenite treatment. However, during IBV infection no eIF2 $\alpha$  phosphorylation was  
377 detected at any time point with levels remaining comparable to that of mock infected cells.  
378 Furthermore, to determine whether IBV infection actively inhibits phosphorylation of eIF2 $\alpha$ ,  
379 Vero cells were infected with IBV and then treated with sodium arsenite prior to cell lysis  
380 (Figure 8B). As before, sodium arsenite treatment of mock infected cells resulted in a  
381 significant increase in the level of phosphorylated eIF2 $\alpha$ . When IBV infected cells were  
382 treated with sodium arsenite, there was also a significant increase in the level of  
383 phosphorylated eIF2 $\alpha$  when compared to IBV infected untreated cells. Significantly, the level  
384 of phosphorylated eIF2 $\alpha$  in these cells appeared comparable to that in mock infected sodium  
385 arsenite treated cells (Figure 8B). Together, this demonstrates that stress granule formation  
386 and translational shut-off observed during IBV replication both occur in the absence of  
387 detectable levels of eIF2 $\alpha$  phosphorylation and that IBV infection does not actively inhibit  
388 eIF2 $\alpha$  phosphorylation.

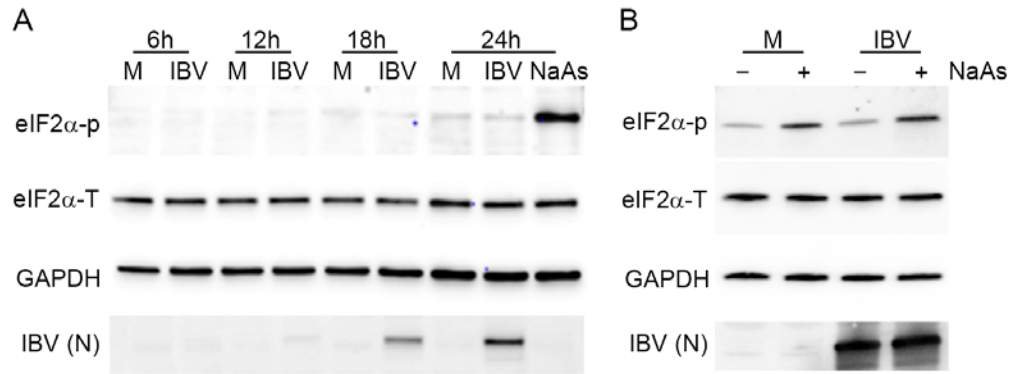

389

390 **Figure 8.** Stress granule formation and translational shut-off during IBV replication are  
391 independent of eIF2 $\alpha$  phosphorylation. **(A)** Vero cells were mock infected or infected with  
392 IBV. At 23 hpi, cells were treated with sodium arsenite (NaAs) to induce phosphorylation  
393 of eIF2 $\alpha$ . At 6, 12, 18 and 24 hpi, cells were washed and lysed. Samples were then  
394 separated by SDS-PAGE and transferred to nitrocellulose. Total eIF2 $\alpha$  (eIF2 $\alpha$ -T) was  
395 detected with anti-eIF2 $\alpha$  (whole), phosphorylated eIF2 $\alpha$  (eIF2 $\alpha$ -p) was detected with  
396 anti-eIF2 $\alpha$ -p. IBV proteins were detected using an anti-IBV antibody with a band  
397 corresponding to the IBV nucleocapsid protein shown (IBV (N)) and an anti-GAPDH  
398 antibody was used as a loading control. **(B)** Vero cells were mock infected or infected with  
399 IBV. At 23 hpi, where indicated, cells were treated with NaAs. Cells were lysed at 24 hpi  
400 and processed and labelled as in **(A)**. Blots are representative of 3 independent biological  
401 replicates.

402

### 403 Discussion

404 Here, we present a study that furthers our understanding of how IBV regulates the important  
405 cellular pathways of the integrated stress response and translation. Firstly, we have  
406 demonstrated that IBV infection inhibits both eIF2 $\alpha$ -dependent and independent SG  
407 formation. Several other viruses have been shown to inhibit SG signaling via regulation of the  
408 eIF2 $\alpha$ -dependent pathway, including Kaposi's sarcoma-associated herpesvirus, Zika virus,  
409 West Nile virus and Junin virus (Amorim *et al.*, 2017; Basu *et al.*, 2017; Linero *et al.*, 2011;  
410 Sharma *et al.*, 2017). These viruses achieve this by inhibiting activation of PKR (Sharma *et al.*  
411 *et al.*, 2017) thereby preventing eIF2 $\alpha$  phosphorylation (Linero *et al.*, 2011) or by  
412 dephosphorylating eIF2 $\alpha$  (Amorim *et al.*, 2017). Zika virus was found to upregulate growth  
413 arrest, and DNA-damage-inducible 34 (GADD34), a component of the protein phosphatase 1  
414 (PP1) complex, and subsequent dephosphorylation of eIF2 $\alpha$  (Amorim *et al.*, 2017).  
415 Interestingly, in the present study, IBV was also found to inhibit eIF2 $\alpha$ -independent SG  
416 signalling. Flaviviruses and Ebola virus also inhibit both eIF2 $\alpha$ -dependent and independent  
417 signalling. Ebola virus achieves this via an interaction between VP35 and several SG  
418 components including; G3BP1, eIF3 and eEF2 (Le Sage *et al.*, 2017; Nelson *et al.*, 2016;

419 Roth *et al.*, 2017). Whether any IBV proteins interact directly with SG components to inhibit  
420 SG formation remains to be determined.

421

422 Despite IBV regulation of multiple SG signalling pathways, infection results in the formation of  
423 SG in approximately 20% of infected cells. Numerous viruses are known to divert SG  
424 components to sites of virus replication to benefit the virus such as poxviruses and reoviruses  
425 (Desmet *et al.*, 2014; Katsafanas and Moss, 2007). However, although not exhaustive, our  
426 analysis suggests that the SG formed in 20% of infected cells are canonical SG produced in  
427 response to virus replication. IBV induced SG were found to contain multiple SG marker  
428 proteins and were susceptible to cycloheximide treatment, hallmarks of canonical SG. In  
429 addition, the SG markers did not co-localize with markers for viral RNA synthesis or particle  
430 assembly. Therefore, they do not appear to resemble the virus specific granules produced  
431 during the replication of other viruses. This then raises the interesting question of how SG  
432 form in this subset of cells. It is possible that viral control of SG signalling may alter over the  
433 course of infection. However, eIF2 $\alpha$  was not phosphorylated even at early time points post  
434 infection and the SG positive subpopulation of cells remained constant at all time points  
435 tested. Therefore, this would not appear to be the case. Other viruses have also been shown  
436 previously to induce SG in only a proportion of infected cells. For example, Semliki Forest  
437 virus infection resulted in SG in 63% of infected cells at 4 hpi with a further decrease after this  
438 point (Panas *et al.*, 2012). In chronic Hepatitis C virus (HCV) infection, an oscillation of the  
439 stress response is seen in which 40% of HCV infected cells treated with interferon- $\alpha$  had SG  
440 but in a live time course this was shown to oscillate in a cell-specific rhythm, with 97% of these  
441 cells displaying SG at some point during infection. This appears to be a strategy by HCV to  
442 modulate the cellular stress response by PKR activated eIF2 $\alpha$  phosphorylation or conversely,  
443 dephosphorylation of eIF2 $\alpha$  by upregulation of GADD34 in a balancing act to prolong cell  
444 survival with oscillating stalls in translation and cell division (Ruggieri *et al.*, 2012). Therefore,  
445 it is possible that in the IBV infected cells containing SG, viral regulation of eIF2 $\alpha$   
446 phosphorylation or other SG signalling pathways is less efficient or these cells perhaps  
447 represent a more complex balancing act. Another possible explanation for this subset of SG  
448 displaying cells is a pre-priming of the cellular innate immunity via a paracrine signalling  
449 effect, as seen with interferon (IFN) signalling in which paracrine IFN activates the JAK/STAT  
450 pathway and upregulates interferon stimulated genes (ISGs). Analysis at the single cell level  
451 will likely be required to tease apart the mechanism of SG formation in the subset of IBV  
452 infected cells that contain them.

453

454 Other members of the coronavirus family have been found to display markedly different  
455 relationships with SG and their regulation. Transmissible gastroenteritis virus (TGEV)  
456 infection was shown to induce specific antiviral SG. In contrast to observations seen here



457 where IBV genomic RNA did not co-localize with G3BP1, these TGEV specific granules  
458 feature an interaction between polypyrimidine tract binding protein (PTB) and viral genomic  
459 and sub-genomic RNA (Sola *et al.*, 2011). During mouse hepatitis virus (MHV) infection,  
460 translational shut-off and SG formation was also observed and MHV replication was  
461 enhanced upon infection of eIF2 $\alpha$ S51A<sup>-/-</sup> cells or TIA<sup>-/-</sup> cells in which translational inhibition  
462 and SG formation are impaired, indicating an inhibitory role for SG during MHV replication  
463 (Raaben *et al.*, 2007). Similar to our observations here, Middle East Respiratory Syndrome  
464 (MERS) CoV inhibits SG formation. This is achieved via an interaction between MERS-CoV  
465 accessory protein 4a and dsRNA, preventing PKR activation (Rabouw *et al.*, 2016).  
466 Therefore, taken together and in agreement with our findings where IBV inhibits multiple SG  
467 induction pathways, this suggests an antiviral function for SG during CoV replication.

468

469 SG usually form following translation inhibition as a result of the aggregation of stalled  
470 mRNPs, translation initiation factors and RNA binding proteins. Therefore, the translational  
471 activity of IBV infected cells was investigated. In agreement with previous work (Kint *et al.*,  
472 2016), translation inhibition occurred during IBV replication from 12 hpi and the degree of  
473 inhibition increased as infection progressed. However, only 20% of infected cells contain SG  
474 and this remained constant across all time points studied. It is possible that some cells with  
475 reduced translational activity are the 20% observed to contain SG. However, this would not  
476 account for all the cells found to have reduced levels of translation, particularly at later time  
477 points. Instead, we consider it more likely that there is an uncoupling of SG formation and  
478 translational repression. Indeed we observe both processes in the absence of eIF2 $\alpha$   
479 phosphorylation indicating altered signalling for both pathways. This situation has also been  
480 observed during murine norovirus (MNV) replication where cellular translation is inhibited and  
481 canonical SG assembly is blocked through repurposing of G3BP1 independently from eIF2 $\alpha$   
482 phosphorylation (Brocard *et al.*, 2019; Fritzlir *et al.*, 2019). MNV translational control is  
483 achieved via the phosphorylation of eIF4E by Mnk1, which in turn is activated by the p38  
484 kinase (Royall *et al.*, 2015; Waskiewicz *et al.*, 1997). The mechanism of IBV translational  
485 control is currently unknown. Other CoVs have been shown to inhibit translation through the  
486 action of viral non-structural protein, nsp1, which binds the 40S ribosomal subunit and cleaves  
487 host mRNA (Narayanan *et al.*, 2015). However, IBV does not express nsp1. Instead, IBV  
488 accessory protein 5b was found to be responsible for translational shut off and stability of  
489 some mRNAs tested was actually increased upon IBV infection, suggesting a completely  
490 different mechanism for control of cellular translation (Kint *et al.*, 2016).

491

492 During this project, IBV replication did not result in phosphorylation of eIF2 $\alpha$  at any of the time  
493 points tested. Furthermore, infection was not able to limit sodium arsenite induction of eIF2 $\alpha$   
494 phosphorylation, showing IBV cannot actively inhibit eIF2 $\alpha$  phosphorylation. This is in

495 contrast to previous findings that IBV nsp2 is a weak antagonist of PKR and that GADD34 is  
496 upregulated during IBV infection resulting in decreased levels of phosphorylated eIF2 $\alpha$  (Wang  
497 *et al.*, 2009). A subsequent study by the same laboratory found that IBV infection also induced  
498 phosphorylation of PERK, and the subsequent activation of ATF4 and the proapoptotic,  
499 GADD153, again resulting in dephosphorylation of eIF2 $\alpha$  (Liao *et al.*, 2013). The reason for  
500 the inconsistency between our current findings and the previous work is not clear although  
501 one methodological difference in the current study is the use of sodium arsenite to induce  
502 eIF2 $\alpha$  phosphorylation, which acts via HRI whilst the previous studies showed the activation if  
503 eIF2 $\alpha$  phosphorylation in virus infected cells via activation of either PKR or PERK. Notably  
504 however, in our work presented here IBV replication did not induce phosphorylation of eIF2 $\alpha$   
505 at any time point and it is therefore not necessarily surprising that mechanisms to  
506 dephosphorylate eIF2 $\alpha$  are also not activated. Indeed the signalling molecule required for  
507 activation of PKR, dsRNA, is known to be concealed within virus induced vesicles during  
508 coronavirus replication (Knoops *et al.*, 2008). Furthermore, interferon signalling, which also  
509 relies upon sensing of dsRNA is not activated in IBV infected cells until very late time points,  
510 consistent with shielding of dsRNA from cellular detection (Kint *et al.*, 2015). Therefore, the  
511 activation of these various cellular signalling pathways in response to IBV infection is likely to  
512 be prevented, consistent with our findings.

513

## 514 **Conclusions**

515 In the present study we have demonstrated that IBV replication effectively blocks both  
516 eIF2 $\alpha$ -dependent and eIF2 $\alpha$ -independent SG signalling pathways. In addition, IBV replication  
517 results in a shut-off of translation. However, interestingly in a proportion of infected cells,  
518 canonical SG are formed that do not localize with sites of viral replication and do not contain  
519 viral RNA. This raises the interesting future possibility of being able to study the composition  
520 and function of canonical cellular SG in virus infected cells. In addition to these findings, in IBV  
521 infected cells, both translational repression and SG formation were found to occur in the  
522 absence of eIF2 $\alpha$  phosphorylation, although IBV replication was not able to actively inhibit  
523 eIF2 $\alpha$  phosphorylation. Therefore, IBV infection of cells results in a dysregulation and  
524 uncoupling of several important cellular signalling pathways. The mechanism behind this  
525 dysregulation remains to be determined but we have furthered our understanding of how IBV  
526 changes the cellular environment to make it favorable for virus replication.

527

528 **Author Contributions:** conceptualization, H.J.M. and N.L.; methodology, M.J.B., N.D.,  
529 M.B., N.L. and H.J.M.; validation, M.J.B., N.D., N.L. and H.J.M.; formal analysis, M.J.B.;  
530 investigation, M.J.B., N.D., N.L. and H.J.M.; resources, H.J.M. and N.L.; writing—original  
531 draft preparation, M.J.B. and H.J.M.; writing—review and editing, M.J.B., N.D., M.B., N.L.

532 and H.J.M.; visualization, M.J.B and H.J.M.; supervision, H.J.M. and N.L.; project  
533 administration, H.J.M.; funding acquisition, H.J.M. and N.L.

534

535 **Funding:** This research was funded by Biotechnology and Biological Sciences Research  
536 Council, grant numbers BBS/E/I/00002535, BBS/E/I/00007034, BBS/E/I/00007038,  
537 BBS/E/I/00007039, BB/N002350 and BB/N000943/1.

538

539 **Acknowledgments:** The authors would like to thank Ambi Batra for providing BEI-inactivated  
540 IBV.

541

542 **Conflicts of Interest:** The authors declare no conflict of interest. The funders had no role in  
543 the design of the study; in the collection, analyses, or interpretation of data; in the writing of  
544 the manuscript, or in the decision to publish the results.

545

## 546 **References**

547 Albornoz, A., Carletti, T., Corazza, G. & Marcello, A. 2014. The stress granule component  
548 TIA-1 binds tick-borne encephalitis virus RNA and is recruited to perinuclear sites of viral  
549 replication to inhibit viral translation. *J Virol*, 88, 6611-22.

550 Amorim, R., Temzi, A., Griffin, B. D. & Moulard, A. J. 2017. Zika virus inhibits  
551 eIF2alpha-dependent stress granule assembly. *PLoS Negl Trop Dis*, 11, e0005775.

552 Basu, M., Courtney, S. C. & Brinton, M. A. 2017. Arsenite-induced stress granule formation is  
553 inhibited by elevated levels of reduced glutathione in West Nile virus-infected cells. *PLoS*  
554 *Pathog*, 13, e1006240.

555 Berlanga, J. J., Ventoso, I., Harding, H. P., Deng, J., Ron, D., Sonenberg, N., Carrasco, L. &  
556 de Haro, C. 2006. Antiviral effect of the mammalian translation initiation factor 2alpha kinase  
557 GCN2 against RNA viruses. *Embo j*, 25, 1730-40.

558 Bordeleau, M. E., Matthews, J., Wojnar, J. M., Lindqvist, L., Novac, O., Jankowsky, E.,  
559 Sonenberg, N., Northcote, P., Teesdale-Spittle, P. & Pelletier, J. 2005. Stimulation of  
560 mammalian translation initiation factor eIF4A activity by a small molecule inhibitor of  
561 eukaryotic translation. *Proc Natl Acad Sci U S A*, 102, 10460-5.

562 Bordeleau, M. E., Mori, A., Oberer, M., Lindqvist, L., Chard, L. S., Higa, T., Belsham, G. J.,  
563 Wagner, G., Tanaka, J. & Pelletier, J. 2006. Functional characterization of IRESes by an  
564 inhibitor of the RNA helicase eIF4A. *Nat Chem Biol*, 2, 213-20.

565 Britton, P., Evans, S., Dove, B., Davies, M., Casais, R. & Cavanagh, D. 2005. Generation of a  
566 recombinant avian coronavirus infectious bronchitis virus using transient dominant selection.  
567 *J Virol Methods*, 123, 203-11.

568 Brocard, M., Iadevaia, V., Klein, P., Hall, B., Lewis, G., Lu, J., Burke, J., Willcocks, M., Parker,  
569 R., Ruggieri, A., Goodfellow, I. & Locker, N. 2019. Norovirus infection results in assembly of  
570 virus-specific G3BP1 granules uncoupled from eIF2a signalling. *PLOS Pathogens*,  
571 Manuscript.

572 Cheng, G., Feng, Z. & He, B. 2005. Herpes simplex virus 1 infection activates the  
573 endoplasmic reticulum resident kinase PERK and mediates eIF-2alpha dephosphorylation by  
574 the gamma(1)34.5 protein. *J Virol*, 79, 1379-88.

575 Contu, L., Steiner, S., Thiel, V. & Muhlemann, O. 2019. The Role of Stress Granules and the  
576 Nonsense-mediated mRNA Decay Pathway in Antiviral Defence. *Chimia (Aarau)*, 73,  
577 374-379.

578 David, A., Dolan, B. P., Hickman, H. D., Knowlton, J. J., Clavarino, G., Pierre, P., Bennink, J.  
579 R. & Yewdell, J. W. 2012. Nuclear translation visualized by ribosome-bound nascent chain  
580 puromycylation. *J Cell Biol*, 197, 45-57.

581 Deng, J., Harding, H. P., Raught, B., Gingras, A. C., Berlanga, J. J., Scheuner, D., Kaufman,  
582 R. J., Ron, D. & Sonenberg, N. 2002. Activation of GCN2 in UV-irradiated cells inhibits  
583 translation. *Curr Biol*, 12, 1279-86.

584 Desmet, E. A., Anguish, L. J. & Parker, J. S. 2014. Virus-mediated compartmentalization of  
585 the host translational machinery. *MBio*, 5, e01463-14.

586 Emara, M. M. & Brinton, M. A. 2007. Interaction of TIA-1/TIAR with West Nile and dengue  
587 virus products in infected cells interferes with stress granule formation and processing body  
588 assembly. *Proc Natl Acad Sci U S A*, 104, 9041-6.

589 Emara, M. M., Fujimura, K., Sciaranghella, D., Ivanova, V., Ivanov, P. & Anderson, P. 2012.  
590 Hydrogen peroxide induces stress granule formation independent of eIF2alpha  
591 phosphorylation. *Biochem Biophys Res Commun*, 423, 763-9.

592 Fritzlar, S., Aktepe, T. E., Chao, Y. W., Kenney, N. D., McAllaster, M. R., Wilen, C. B., White,  
593 P. A. & Mackenzie, J. M. 2019. Mouse Norovirus Infection Arrests Host Cell Translation  
594 Uncoupled from the Stress Granule-PKR-eIF2alpha Axis. *MBio*, 10.

595 Fros, J. J., Domeradzka, N. E., Baggen, J., Geertsema, C., Flipse, J., Vlak, J. M. & Pijlman, G.  
596 P. 2012. Chikungunya virus nsP3 blocks stress granule assembly by recruitment of G3BP into  
597 cytoplasmic foci. *J Virol*, 86, 10873-9.

598 Garcia, M. A., Meurs, E. F. & Esteban, M. 2007. The dsRNA protein kinase PKR: virus and  
599 cell control. *Biochimie*, 89, 799-811.

600 Harding, H. P., Zhang, Y. & Ron, D. 1999. Protein translation and folding are coupled by an  
601 endoplasmic-reticulum-resident kinase. *Nature*, 397, 271-4.

602 Katsafanas, G. C. & Moss, B. 2007. Colocalization of transcription and translation within  
603 cytoplasmic poxvirus factories coordinates viral expression and subjugates host functions.  
604 *Cell Host Microbe*, 2, 221-8.

605 Kedersha, N. & Anderson, P. 2002. Stress granules: sites of mRNA triage that regulate mRNA  
606 stability and translatability. *Biochem Soc Trans*, 30, 963-9.

607 Kint, J., Fernandez-Gutierrez, M., Maier, H. J., Britton, P., Langereis, M. A., Koumans, J.,  
608 Wiegertjes, G. F. & Forlenza, M. 2015. Activation of the Chicken Type I Interferon Response  
609 by Infectious Bronchitis Coronavirus. *Journal of Virology*, 89, 1156-1167.

610 Kint, J., Langereis, M. A., Maier, H. J., Britton, P., van Kuppeveld, F. J., Koumans, J.,  
611 Wiegertjes, G. F. & Forlenza, M. 2016. Infectious Bronchitis Coronavirus Limits Interferon  
612 Production by Inducing a Host Shutoff That Requires Accessory Protein 5b. *J Virol*, 90,  
613 7519-28.

614 Knoops, K., Kikkert, M., van den Worm, S. H. E., Zevenhoven-Dobbe, J. C., van der Meer, Y.,  
615 Koster, A. J., Mommaas, A. M. & Snijder, E. J. 2008. SARS-coronavirus replication is  
616 supported by a reticulovesicular network of modified endoplasmic reticulum. *Plos Biology*, 6,  
617 1957-1974.

618 Le Sage, V., Cinti, A., McCarthy, S., Amorim, R., Rao, S., Daino, G. L., Tramontano, E.,  
619 Branch, D. R. & Moulard, A. J. 2017. Ebola virus VP35 blocks stress granule assembly.  
620 *Virology*, 502, 73-83.

621 Liao, Y., Fung, T. S., Huang, M., Fang, S. G., Zhong, Y. & Liu, D. X. 2013. Upregulation of  
622 CHOP/GADD153 during coronavirus infectious bronchitis virus infection modulates apoptosis  
623 by restricting activation of the extracellular signal-regulated kinase pathway. *J Virol*, 87,  
624 8124-34.

625 Lin, Y., Protter, D. S., Rosen, M. K. & Parker, R. 2015. Formation and Maturation of  
626 Phase-Separated Liquid Droplets by RNA-Binding Proteins. *Mol Cell*, 60, 208-19.

627 Linero, F. N., Thomas, M. G., Boccaccio, G. L. & Sclaro, L. A. 2011. Junin virus infection  
628 impairs stress-granule formation in Vero cells treated with arsenite via inhibition of eIF2alpha  
629 phosphorylation. *J Gen Virol*, 92, 2889-99.

630 Low, W. K., Dang, Y., Schneider-Poetsch, T., Shi, Z., Choi, N. S., Merrick, W. C., Romo, D. &  
631 Liu, J. O. 2005. Inhibition of eukaryotic translation initiation by the marine natural product  
632 pateamine A. *Mol Cell*, 20, 709-22.

633 Lu, L., Han, A. P. & Chen, J. J. 2001. Translation initiation control by heme-regulated  
634 eukaryotic initiation factor 2alpha kinase in erythroid cells under cytoplasmic stresses. *Mol*  
635 *Cell Biol*, 21, 7971-80.

636 Maier, H. J., Hawes, P. C., Cottam, E. M., Mantell, J., Verkade, P., Monaghan, P., Wileman, T.  
637 & Britton, P. 2013. Infectious bronchitis virus generates spherules from zippered endoplasmic  
638 reticulum membranes. *MBio*, 4, e00801-13.

639 Matthews, J. D. & Frey, T. K. 2012. Analysis of subcellular G3BP redistribution during rubella  
640 virus infection. *J Gen Virol*, 93, 267-74.

641 Mazroui, R., Sukarieh, R., Bordeleau, M. E., Kaufman, R. J., Northcote, P., Tanaka, J.,  
642 Gallouzi, I. & Pelletier, J. 2006. Inhibition of ribosome recruitment induces stress granule  
643 formation independently of eukaryotic initiation factor 2alpha phosphorylation. *Mol Biol Cell*,  
644 17, 4212-9.

645 McCormick, C. & Khapersky, D. A. 2017. Translation inhibition and stress granules in the  
646 antiviral immune response. *Nat Rev Immunol*, 17, 647-660.

647 McInerney, G. M., Kedersha, N. L., Kaufman, R. J., Anderson, P. & Liljestrom, P. 2005.  
648 Importance of eIF2alpha phosphorylation and stress granule assembly in alphavirus  
649 translation regulation. *Mol Biol Cell*, 16, 3753-63.

650 Molliex, A., Temirov, J., Lee, J., Coughlin, M., Kanagaraj, A. P., Kim, H. J., Mittag, T. & Taylor,  
651 J. P. 2015. Phase separation by low complexity domains promotes stress granule assembly  
652 and drives pathological fibrillization. *Cell*, 163, 123-33.

653 Nakagawa, K., Narayanan, K., Wada, M. & Makino, S. 2018. Inhibition of Stress Granule  
654 Formation by Middle East Respiratory Syndrome Coronavirus 4a Accessory Protein  
655 Facilitates Viral Translation, Leading to Efficient Virus Replication. *J Virol*, 92.

656 Narayanan, K., Ramirez, S. I., Lokugamage, K. G. & Makino, S. 2015. Coronavirus  
657 nonstructural protein 1: Common and distinct functions in the regulation of host and viral gene  
658 expression. *Virus Res*, 202, 89-100.

659 Nelson, E. V., Schmidt, K. M., Deflube, L. R., Doganay, S., Banadyga, L., Olejnik, J., Hume, A.  
660 J., Ryabchikova, E., Ebihara, H., Kedersha, N., Ha, T. & Muhlberger, E. 2016. Ebola Virus  
661 Does Not Induce Stress Granule Formation during Infection and Sequesters Stress Granule  
662 Proteins within Viral Inclusions. *J Virol*, 90, 7268-7284.

663 Panas, M. D., Varjak, M., Lulla, A., Eng, K. E., Merits, A., Karlsson Hedestam, G. B. &  
664 McInerney, G. M. 2012. Sequestration of G3BP coupled with efficient translation inhibits  
665 stress granules in Semliki Forest virus infection. *Mol Biol Cell*, 23, 4701-12.

666 Poblete-Duran, N., Prades-Perez, Y., Vera-Otarola, J., Soto-Rifo, R. & Valiente-Echeverria,  
667 F. 2016. Who Regulates Whom? An Overview of RNA Granules and Viral Infections. *Viruses*,  
668 8.

669 Protter, D. S. & Parker, R. 2016. Principles and Properties of Stress Granules. *Trends Cell*  
670 *Biol*, 26, 668-79.

671 Raaben, M., Groot Koerkamp, M. J., Rottier, P. J. & de Haan, C. A. 2007. Mouse hepatitis  
672 coronavirus replication induces host translational shutoff and mRNA decay, with concomitant  
673 formation of stress granules and processing bodies. *Cell Microbiol*, 9, 2218-29.

674 Rabouw, H. H., Langereis, M. A., Knaap, R. C., Dalebout, T. J., Canton, J., Sola, I., Enjuanes,  
675 L., Bredenbeek, P. J., Kikkert, M., de Groot, R. J. & van Kuppeveld, F. J. 2016. Middle East

676 Respiratory Coronavirus Accessory Protein 4a Inhibits PKR-Mediated Antiviral Stress  
677 Responses. *PLoS Pathog*, 12, e1005982.

678 Reineke, L. C., Kedersha, N., Langereis, M. A., van Kuppeveld, F. J. & Lloyd, R. E. 2015.  
679 Stress granules regulate double-stranded RNA-dependent protein kinase activation through a  
680 complex containing G3BP1 and Caprin1. *MBio*, 6, e02486.

681 Roth, H., Magg, V., Uch, F., Mutz, P., Klein, P., Haneke, K., Lohmann, V., Bartenschlager, R.,  
682 Fackler, O. T., Locker, N., Stoecklin, G. & Ruggieri, A. 2017. Flavivirus Infection Uncouples  
683 Translation Suppression from Cellular Stress Responses. *MBio*, 8.

684 Royall, E., Doyle, N., Abdul-Wahab, A., Emmott, E., Morley, S. J., Goodfellow, I., Roberts, L.  
685 O. & Locker, N. 2015. Murine norovirus 1 (MNV1) replication induces translational control of  
686 the host by regulating eIF4E activity during infection. *J Biol Chem*, 290, 4748-58.

687 Ruggieri, A., Dazert, E., Metz, P., Hofmann, S., Bergeest, J.-P., Mazur, J., Bankhead, P., Hiet,  
688 M.-S., Kallis, S., Alvisi, G., Samuel, C. E., Lohmann, V., Kaderali, L., Rohr, K., Frese, M.,  
689 Stoecklin, G. & Bartenschlager, R. 2012. Dynamic oscillation of translation and stress granule  
690 formation mark the cellular response to virus infection. *Cell host & microbe*, 12, 71-85.

691 Schneider, C. A., Rasband, W. S. & Eliceiri, K. W. 2012. NIH Image to ImageJ: 25 years of  
692 image analysis. *Nature Methods*, 9, 671-675.

693 Sharma, N. R., Majerciak, V., Kruhlak, M. J. & Zheng, Z. M. 2017. KSHV inhibits stress  
694 granule formation by viral ORF57 blocking PKR activation. *PLoS Pathog*, 13, e1006677.

695 Sola, I., Galan, C., Mateos-Gomez, P. A., Palacio, L., Zuniga, S., Cruz, J. L., Almazan, F. &  
696 Enjuanes, L. 2011. The polypyrimidine tract-binding protein affects coronavirus RNA  
697 accumulation levels and relocalizes viral RNAs to novel cytoplasmic domains different from  
698 replication-transcription sites. *J Virol*, 85, 5136-49.

699 Van Treeck, B., Protter, D. S. W., Matheny, T., Khong, A., Link, C. D. & Parker, R. 2018. RNA  
700 self-assembly contributes to stress granule formation and defining the stress granule  
701 transcriptome. *Proceedings of the National Academy of Sciences of the United States of*  
702 *America*, 115, 2734-2739.

703 Walsh, D., Mathews, M. B. & Mohr, I. 2013. Tinkering with translation: protein synthesis in  
704 virus-infected cells. *Cold Spring Harb Perspect Biol*, 5, a012351.



705 Wang, X., Liao, Y., Yap, P. L., Png, K. J., Tam, J. P. & Liu, D. X. 2009. Inhibition of protein  
706 kinase R activation and upregulation of GADD34 expression play a synergistic role in  
707 facilitating coronavirus replication by maintaining de novo protein synthesis in virus-infected  
708 cells. *J Virol*, 83, 12462-72.

709 Waskiewicz, A. J., Flynn, A., Proud, C. G. & Cooper, J. A. 1997. Mitogen-activated protein  
710 kinases activate the serine/threonine kinases Mnk1 and Mnk2. *Embo j*, 16, 1909-20.

711 Wheeler, J. R., Matheny, T., Jain, S., Abrisch, R. & Parker, R. 2016. Distinct stages in stress  
712 granule assembly and disassembly. *Elife*, 5.

713 White, J. P., Cardenas, A. M., Marissen, W. E. & Lloyd, R. E. 2007. Inhibition of cytoplasmic  
714 mRNA stress granule formation by a viral proteinase. *Cell Host Microbe*, 2, 295-305.

715
